# Supplementary material for: TRK xDFG Mutations Trigger a Sensitivity Switch from Type I to II Kinase Inhibitors
Source: Oxford University Press journal article supplement (doi:10.1158/2159-8290.cd-20-0571), 2020-10-01
Supplement: 21598290cd200571-sup-242461_2_supp_6602132_qh6n2l.xlsx [file 21598290cd200571-sup-242461_2_supp_6602132_qh6n2l.xlsx]

## Sheet: Table S1A
Supplementary Table S1A. Summary of production of molecular dynamics simulations details and total simulation time for each TRKA system
TRKA			Simulations	Total simulation time (ns)
System	State	Bound/unbound
WT	Active	Apo	3 x 250 ns	750
	Active	larotrectinib	3 x 250 ns	750
	Active	selitrectinib	3 x 250 ns	750
	Active	repotrectinib	3 x 250 ns	750
G595R	Active	Apo	3 x 250 ns	750
	Active	larotrectinib	3 x 250 ns	750
	Active	selitrectinib	3 x 250 ns	750
	Active	repotrectinib	3 x 250 ns	750
G667C	Active	Apo	3 x 250 ns	750
	Active	larotrectinib	3 x 250 ns	750
	Active	selitrectinib	3 x 250 ns	750
	Active	repotrectinib	3 x 250 ns	750
G667A	Active	Apo	3 x 250 ns	750
	Active	larotrectinib	3 x 250 ns	750
	Active	selitrectinib	3 x 250 ns	750
	Active	repotrectinib	3 x 250 ns	750
G595R/G667A	Active	Apo	3 x 250 ns	750
	Active	larotrectinib	3 x 250 ns	750
	Active	selitrectinib	3 x 250 ns	750
	Active	repotrectinib	3 x 250 ns	750
G595R/G667C	Active	Apo	3 x 250 ns	750
	Active	larotrectinib	3 x 250 ns	750
	Active	selitrectinib	3 x 250 ns	750
	Active	repotrectinib	3 x 250 ns	750
WT	Inactive	Apo	3 x 250 ns	750
	Inactive	cabozantinib	3 x 250 ns	750
	Inactive	foretinib	3 x 250 ns	750
	Inactive	ponatinib	3 x 250 ns	750
G595R	Inactive	Apo	3 x 250 ns	750
	Inactive	cabozantinib	3 x 250 ns	750
	Inactive	foretinib	3 x 250 ns	750
	Inactive	ponatinib	3 x 250 ns	750
G667C	Inactive	Apo	3 x 250 ns	750
	Inactive	cabozantinib	3 x 250 ns	750
	Inactive	foretinib	3 x 250 ns	750
	Inactive	ponatinib	3 x 250 ns	750
G667A	Inactive	Apo	3 x 250 ns	750
	Inactive	cabozantinib	3 x 250 ns	750
	Inactive	foretinib	3 x 250 ns	750
	Inactive	ponatinib	3 x 250 ns	750
G595R/G667C	Inactive	Apo	3 x 250 ns	750
	Inactive	cabozantinib	3 x 250 ns	750
	Inactive	foretinib	3 x 250 ns	750
	Inactive	ponatinib	3 x 250 ns	750
G595R/G667A	Inactive	Apo	3 x 250 ns	750
	Inactive	cabozantinib	3 x 250 ns	750
	Inactive	foretinib	3 x 250 ns	750
	Inactive	ponatinib	3 x 250 ns	750
Total				36000

## Sheet: Table S1B
Supplementary Table S1B. Details of Molecular Dynamics simulations carried out for TRKC
TRKC			Simulation replicas	Total simulation time (ns)
System	State	Apo/liganded
WT	Active	Apo	3 x 250 ns	750
	Active	larotrectinib	3 x 250 ns	750
	Active	selitrectinib	3 x 250 ns	750
	Active	repotrectinib	3 x 250 ns	750
G623R	Active	Apo	3 x 250 ns	750
	Active	larotrectinib	3 x 250 ns	750
	Active	selitrectinib	3 x 250 ns	750
	Active	repotrectinib	3 x 250 ns	750
G696C	Active	Apo	3 x 250 ns	750
	Active	larotrectinib	3 x 250 ns	750
	Active	selitrectinib	3 x 250 ns	750
	Active	repotrectinib	3 x 250 ns	750
G696A	Active	Apo	3 x 250 ns	750
	Active	larotrectinib	3 x 250 ns	750
	Active	selitrectinib	3 x 250 ns	750
	Active	repotrectinib	3 x 250 ns	750
G623R/G696A	Active	Apo	3 x 250 ns	750
	Active	larotrectinib	3 x 250 ns	750
	Active	selitrectinib	3 x 250 ns	750
	Active	repotrectinib	3 x 250 ns	750
G623R/G696C	Active	Apo	3 x 250 ns	750
	Active	larotrectinib	3 x 250 ns	750
	Active	selitrectinib	3 x 250 ns	750
	Active	repotrectinib	3 x 250 ns	750
WT	Inactive	Apo	3 x 250 ns	750
	Inactive	cabozantinib	3 x 250 ns	750
	Inactive	foretinib	3 x 250 ns	750
	Inactive	ponatinib	3 x 250 ns	750
G623R	Inactive	Apo	3 x 250 ns	750
	Inactive	cabozantinib	3 x 250 ns	750
	Inactive	foretinib	3 x 250 ns	750
	Inactive	ponatinib	3 x 250 ns	750
G696C	Inactive	Apo	3 x 250 ns	750
	Inactive	cabozantinib	3 x 250 ns	750
	Inactive	foretinib	3 x 250 ns	750
	Inactive	ponatinib	3 x 250 ns	750
G696A	Inactive	Apo	3 x 250 ns	750
	Inactive	cabozantinib	3 x 250 ns	750
	Inactive	foretinib	3 x 250 ns	750
	Inactive	ponatinib	3 x 250 ns	750
G623R/G696C	Inactive	Apo	3 x 250 ns	750
	Inactive	cabozantinib	3 x 250 ns	750
	Inactive	foretinib	3 x 250 ns	750
	Inactive	ponatinib	3 x 250 ns	750
G623R/G696A	Inactive	Apo	3 x 250 ns	750
	Inactive	cabozantinib	3 x 250 ns	750
	Inactive	foretinib	3 x 250 ns	750
	Inactive	ponatinib	3 x 250 ns	750
Total				36000

## Sheet: Table S1C
Supplementary Table S1C. Details of Molecular Dynamics simulations carried out for ROS1
ROS1			Simulation replicas	Total simulation time (ns)
System	State	Apo/liganded
WT	Inactive	Apo	3 x 250 ns	750
G2101A	Inactive	Apo	3 x 250 ns	750
G2101C	Inactive	Apo	3 x 250 ns	750
Total				2250

## Sheet: Table S2A
Supplementary Table S2A. Sequences of crRNA and ssODN
	Sequences (5' to 3')
crRNA targeting G598	TGTACCGGAGGAAACGGTTG
crRNA targeting G670	CGCAACTGTCTGGTGGGTCA
ssODN for G598R	CTGCTCACCATGCTACAGCACCAGCACATCGTGCGCTTCTTTGGAGTCTGCACCGAGGGTGGCCCGTTGCTCATGGTCTTTGAGTACATGCGCCACaGGGAtCTCAACCGTTTCCTCCGGTACAAGAACCCACCCCTGCTCCCTTCCCTGCTCTCTTCCCTGCAAGAGTATCCTTGCTTGTCCGCCAGGTGACTTTCCA
ssODN for G670C	TGGCTGCTGGTATGGTATATCTAGCCAGCCTGCACTTTGTGCACCGGGATCTGGCCACACGCAACTGTCTGGTGGGcCAaGGACTAGTGGTGAAGATTtGtGACTTTGGCATGAGCAGAGACATCTATAGCACAGACTATTACCGAGTAAGTGTCCCTAAACCTTCCCAGCATCTGTACTGTCCACAGCCTTGCTTGGG
ssODN for G670A	TGGCTGCTGGTATGGTATATCTAGCCAGCCTGCACTTTGTGCACCGGGATCTGGCCACACGCAACTGTCTGGTGGGcCAaGGACTAGTGGTGAAGATTGcAGACTTTGGCATGAGCAGAGACATCTATAGCACAGACTATTACCGAGTAAGTGTCCCTAAACCTTCCCAGCATCTGTACTGTCCACAGCCTTGCTTGGG

## Sheet: Table S2B
Supplementary Table S2B. Primer sequences
PCR	Sequences (5' to 3')	Target
Ntrk1-A	GGTCTTTCTCGCTGAGTGCT	Ntrk1 exon13-intron14 region encompassing G598 (695 bp)
Ntrk1-B	CCTGGAACCCATCTGATGAT
Ntrk1-C	CAGCTTCTGGCTGTGGCTA	Ntrk1 exon15-intron15 region encompassing G670 (359 bp)
Ntrk1-D	TGCTGAGGGACCAGTAGAGAA
Ntrk1-A	GGTCTTTCTCGCTGAGTGCT	Ntrk1 exon13-intron15 region encompassing G598 and G670 (1896 bp)
Ntrk1-E	GTTTCCCATCAGGGTCTGAG
Ntrk1-F	CTACAGCACCAGCACATCGT	Ntrk1 exon14-intron14 region encompassing G598 region (215 bp) for CRISPR sequencing
Ntrk1-G	CACATGAACCTTTGCTCCCTA
Ntrk1-H	ACCTGATGCAAAGCTGCTG	Ntrk1 exon15 region encompassing G670 region (217 bp) for CRISPR sequencing
Ntrk1-I	GCTATAGATGTCTCTGCTCATGC
RT-PCR	Sequences (5' to 3')	Target
Bcan-fwd	AGCTACCCCTGGCTCAAATA	Ntrk1 exon13
Ntrk1-fwd	GGACGGTAACAGCACATCAA	Ntrk1 exon9-10
Ntrk1-rev	AAAGCTCCACACATCGCTCT	Ntrk1 exon16
